# Supplementary material for: The Strong Cell-based Hydrogen Peroxide Generation Triggered by Cold Atmospheric Plasma
Source: PubMed Central journal article supplement (PMC5589829; doi:10.1038/s41598-017-11480-x), 2017-09-07
Supplement: 41598_2017_11480_MOESM1_ESM.pdf [file 41598_2017_11480_MOESM1_ESM.pdf]

# **The Strong Cell-based Hydrogen Peroxide Generation Triggered by Cold Atmospheric Plasma**

Dayun Yan<sup>1\*</sup>, Haitao Cui<sup>1</sup>, Wei Zhu<sup>1</sup>, Annie Talbot<sup>2</sup>, Lijie Grace Zhang<sup>1</sup>, Jonathan H. Sherman<sup>3</sup>,  
and Michael Keidar<sup>1\*</sup>

<sup>1</sup>Department of Mechanical and Aerospace Engineering, The George Washington University,  
Science & Engineering Hall, 800 22<sup>nd</sup> Street, NW, Washington, DC 20052, USA

<sup>2</sup>Columbian College of Arts and Sciences, The George Washington University, Philips Hall, 801  
22<sup>nd</sup> Street, NW, Suite 212, Washington, DC 20052, USA

<sup>3</sup>Neurological Surgery, The George Washington University, Foggy Bottom South Pavilion, 22<sup>nd</sup>  
Street, NW, 7<sup>th</sup> Floor, Washington, DC 20037, USA

\*Corresponding authors: Dayun Yan [ydy2012@gwmail.gwu.edu](mailto:ydy2012@gwmail.gwu.edu), Michael Keidar  
[keidar@gwu.edu](mailto:keidar@gwu.edu)

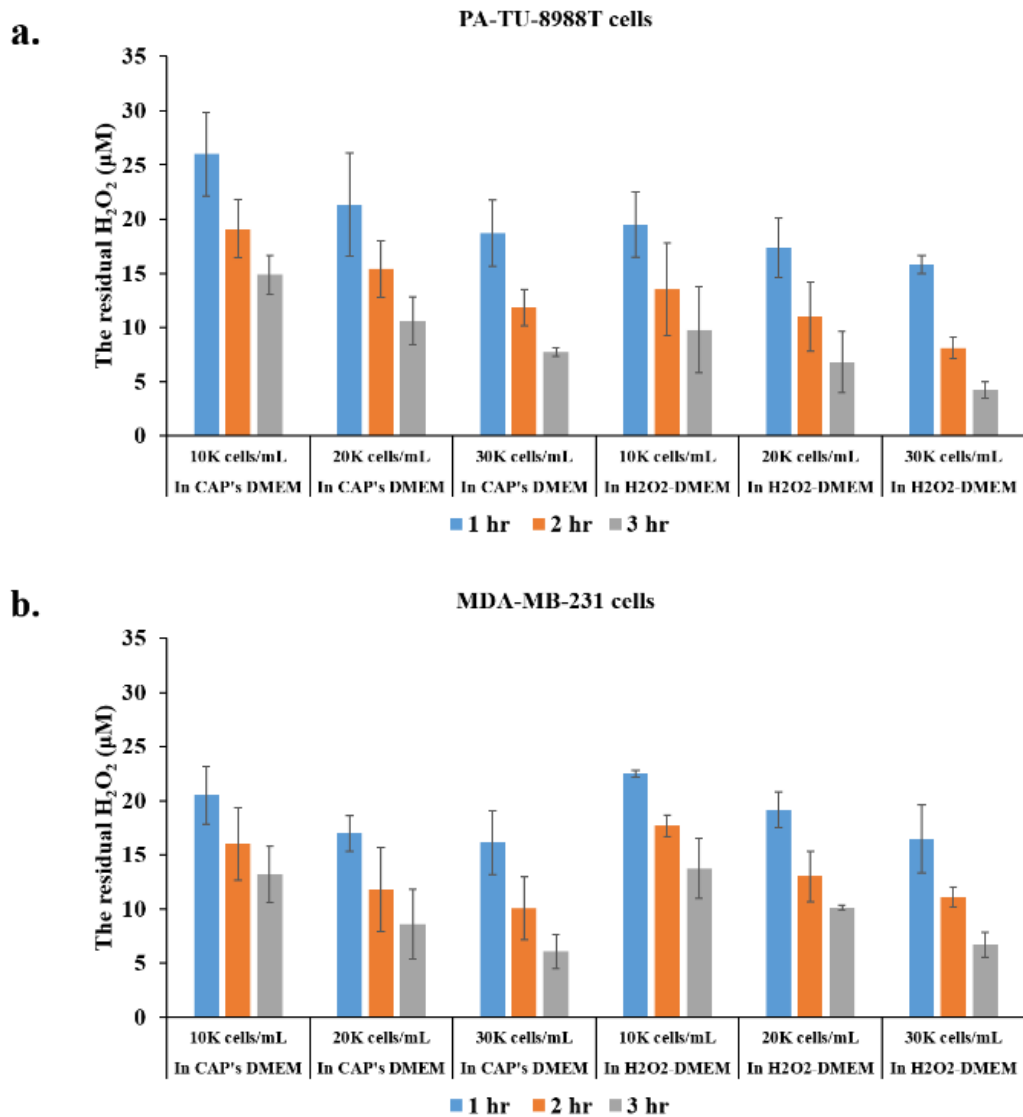

Fig. S1. Cancer cells quickly consume the  $H_2O_2$  in CAP-stimulated DMEM (CAP's medium) and in  $H_2O_2$ -containing DMEM ( $H_2O_2$ -DMEM) in hours. (a) PA-TU-8988T cells. (b) MDA-MB-231 cells. Consuming  $H_2O_2$  is a basic feature of cancer cells exposed to  $H_2O_2$ . 1 hr, 2 hr, and 3 hr represent the time length that two cell lines cultured in CAP's DMEM or in  $H_2O_2$ -DMEM. The initial  $H_2O_2$  concentration in CAP's medium and  $H_2O_2$ -DMEM is the same and is not shown at

here. K represent  $1 \times 10^3$ . Results are presented as the mean  $\pm$  s.d. of two independently repeated experiments in triplicate.

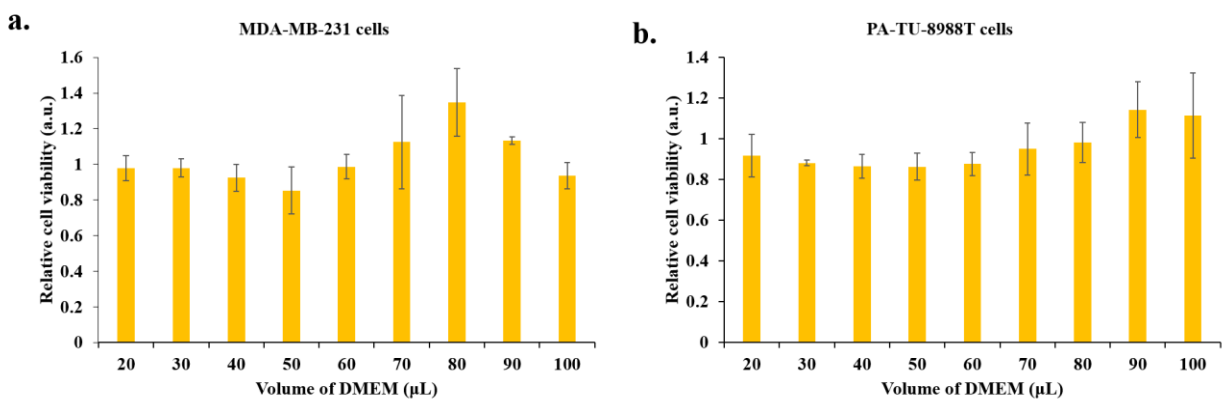

Fig. S2. The effect of helium flow on the cell viability of cancer cells. (a) PA-TU-8988T cells. (b) MDA-MB-231 cells. Results are presented as the mean  $\pm$  s.d. of three independently repeated experiments.

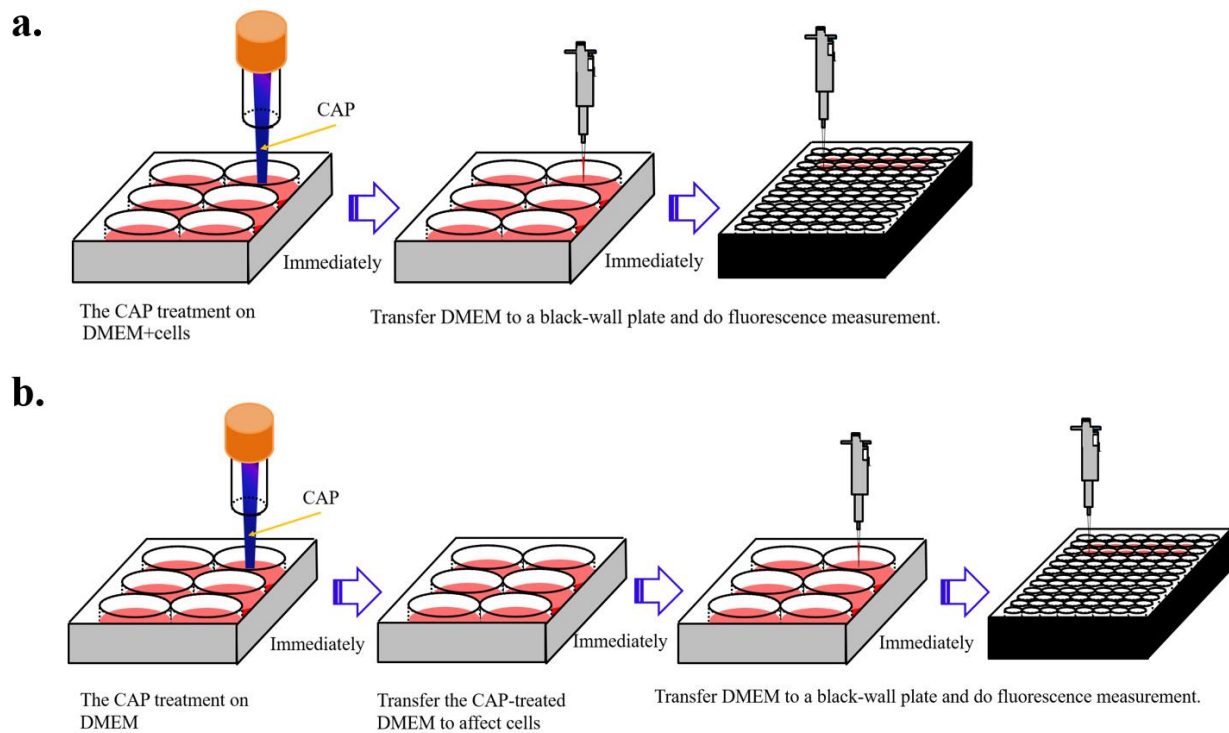

Fig. S3. Schematic illustration for the protocols of CAP treatment. (a) Direct CAP treatment. (b) Indirect CAP treatment.
